# Supplementary material
Source: PubMed Central journal article supplement (PMC2944729)
Supplement: 1004664107_pnas.201004664SI.pdf [file 1004664107_pnas.201004664SI.pdf]

# Supporting Information

Draghi and Denzin 10.1073/pnas.1004664107

## SI Methods

**Flow Cytometry.** Cells were stained in PBS containing 1% FBS, 2 mM EDTA, and 0.02% sodium azide. Cells were blocked with anti-Fc $\gamma$  mAb and normal mouse serum and stained with the following Abs or chemical conjugates: NIP-PE, CD45.1-Alexa647, and CD4-Alexa633 (Memorial Sloan-Kettering Cancer Center mAb Core Facility); CD19-APC-Cy7, Fas-biotin, GL7-FITC, CD45.2-perCP-Cy5.5, CD4-FITC, V $\alpha$ 2-PE, V $\beta$ 6-FITC, PD-1-FITC, and CXCR5-PE (BD Pharmingen); and eFluor-450-streptavidin (eBioscience). Data were collected on a BD LSRII cytometer (BD Biosciences). DAPI was added to the samples before analysis to allow for dead cell exclusion. Cell doublets were also excluded from the analysis. Data were analyzed using FlowJo software (Tree Star).

**T-Cell Assays.** For generation of polyclonal NP-CGG specific CD4 T cells, B6 mice were immunized in the hocks and base of tail with 400  $\mu$ g NP-CGG in 200  $\mu$ L as an alum precipitate. Then, 7–10 d later, CGG-specific CD4 T cells were purified from draining lymph nodes by negative selection (Naïve CD4 T Cell Isolation Kit II; Miltenyi Biotech). For CGG presentation assays, resting

B cells were purified from B1-8, B1-8.H2-O<sup>-/-</sup>, and non-transgenic littermates by negative selection using CD43 MACS beads (Miltenyi Biotech) and activated overnight with 2  $\mu$ g/mL anti-CD40 (mAb FGK45). Next,  $2 \times 10^4$  NP<sup>+</sup> B cells or a matched number of total B cells from nontransgenic control mice were incubated for 30 min on ice with titrated amounts of NP-CGG (0.001–100  $\mu$ g/mL). Cells were washed twice, and  $1 \times 10^5$  CGG-specific polyclonal CD4 T cells were added and incubated at 37 °C for 72 h. For NP-OVA assays, B1-8 and B1-8.H2-O<sup>-/-</sup> mice were immunized i.p. with NP-OVA in alum (50  $\mu$ g in 200  $\mu$ L alum). Two days later, NP<sup>+</sup> splenic B cells were purified by staining cells with NP-PE, followed by the addition of anti-PE MACS beads (Miltenyi Biotech) and positive magnetic sorting. Then  $2.5 \times 10^4$  MACS purified OT-II T cells (Naïve CD4 T Cell Isolation Kit II; Miltenyi Biotech) were added to titrated numbers of B cells ( $0\text{--}1 \times 10^5$  cells/well) and incubated at 37 °C for 72 h. B cells were irradiated at 2000 rads before use as APCs. T-cell proliferation after 48 h was measured by the addition of 1  $\mu$ Ci/well of [<sup>3</sup>H]thymidine. Results are expressed as mean cpm ( $\pm$  SEM) of triplicate cultures. B- and T-cell purity was >85% as measured by flow cytometry.







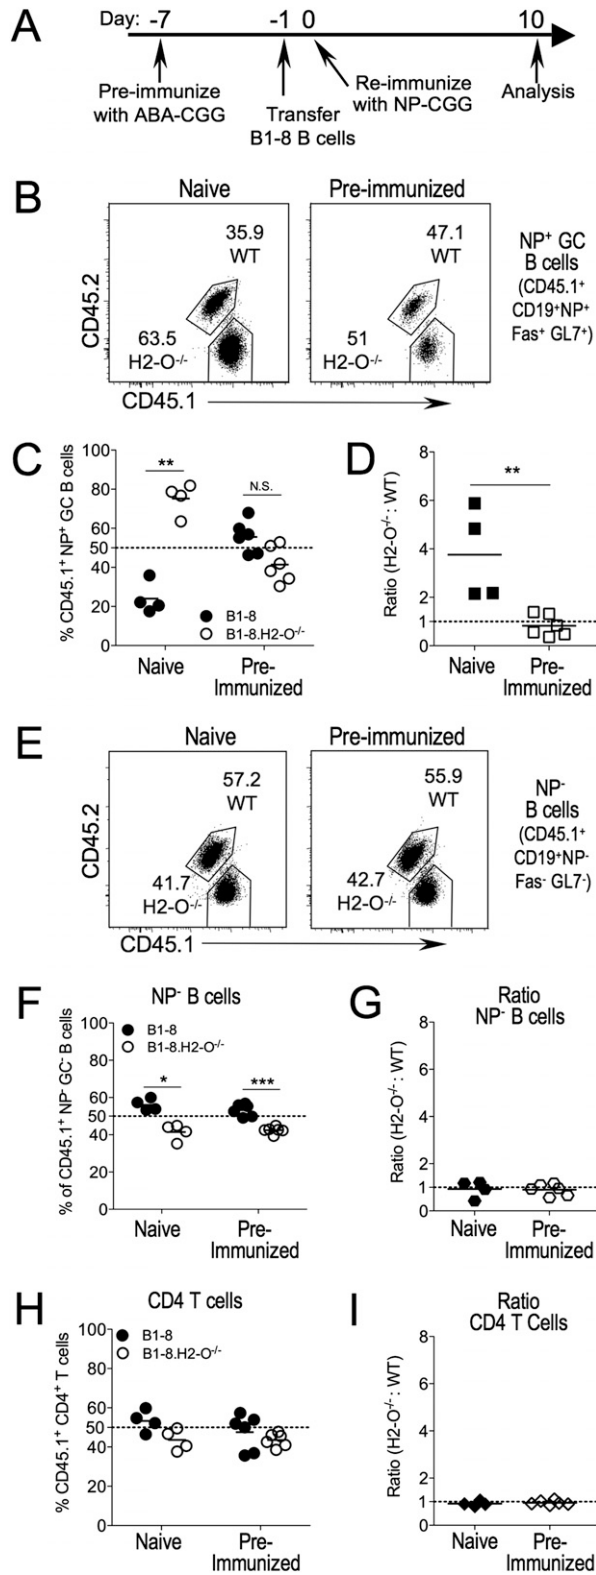

**Fig. 55.** Preimmunization with ABA-CGG to expand pool of CGG-specific T<sub>FH</sub> cells before B-cell transfer results in similar numbers and percentages of B1-8 WT and H2-O<sup>-/-</sup> GCB cells after immunization with NP-CGG. (A) Schematic representation of experiment setup. Marked B1-8 and B1-8.H2-O<sup>-/-</sup> cells were mixed at a 1:1 ratio and transferred into either naïve hosts or hosts that had been immunized 7 d prior with ABA-CGG. The next day, ABA-CGG preimmunized mice were immunized with NP-CGG in alum (preimmunized). (B) Contribution of WT and H2-O<sup>-/-</sup> B1-8 cells to the NP<sup>+</sup> GC B-cell pool upon preimmunization. (C and D) Quantification of population defined in B as percentage of donor-derived NP<sup>+</sup> GC B cells (C) and as a ratio of H2-O<sup>-/-</sup> to WT populations, normalized to ratio in transferred mixture (D). (E–G) Contribution of H2-O<sup>-/-</sup> and WT cells to donor-derived NP<sup>-</sup> non-GC B-cell population in naïve versus preimmunized hosts shown as (E) FACS plots, (F) percentages, and (G) normalized ratio of H2-O<sup>-/-</sup> to WT cells. (H and I) Quantification of the contribution of H2-O<sup>-/-</sup> and WT cells to donor-derived CD4<sup>+</sup> T-cell population as (H) percentages and (I) normalized ratio of H2-O<sup>-/-</sup> to WT cells. Statistical significance was calculated using a two-tailed paired t test in C, F, and H and two-tailed unpaired t test in D, G, and I.

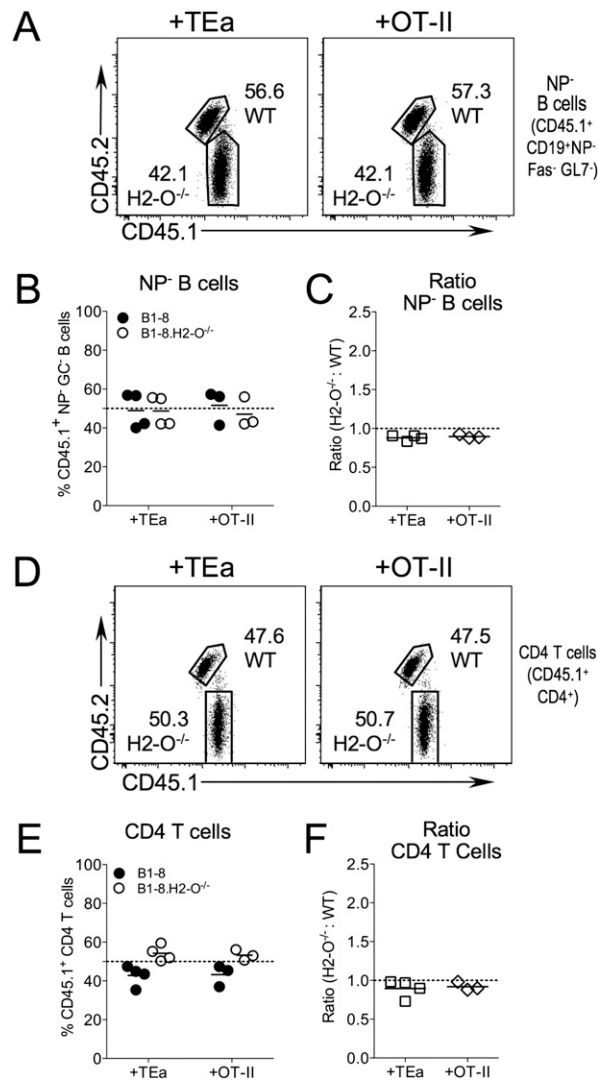

**Fig. S6.** Change in H2-O<sup>-/-</sup> and WT B-cell proportions is confined to Ag-specific B-cell subset upon the addition of OT-II T cells. (A–C) Contribution of H2-O<sup>-/-</sup> and WT cells to donor-derived non-GC NP<sup>-</sup> B-cell population in hosts that received nonspecific (TEa) or Ag-specific (OT-II) T cells shown as (A) FACS plots (B) percentages, and (C) normalized ratio of H2-O<sup>-/-</sup> to WT cells. (D–F) Contribution of H2-O<sup>-/-</sup> and WT cells to donor-derived CD4<sup>+</sup> T-cell population in hosts that received extra nonspecific or Ag-specific T cells shown as (D) FACS plots, (E) percentages, and (F) normalized ratio of H2-O<sup>-/-</sup> to WT cells.
